# Supplementary material for: Comparison of H2O Adsorption and Dissociation Behaviors on Rutile (110) and Anatase (101) Surfaces Based on ReaxFF Molecular Dynamics Simulation
Source: MDPI journal article supplement (doi:10.3390/molecules28196823), 2023-09-27
Supplement: s1 [file s1]

## Supporting Information

### **Comparison of H<sub>2</sub>O Adsorption and Dissociation Behaviors on Rutile (110) and Anatase (101) Surfaces Based on ReaxFF Molecular Dynamics Simulation**

**He Zhou, Heng Zhang, and Shiling Yuan\***

## 1. The calculation models

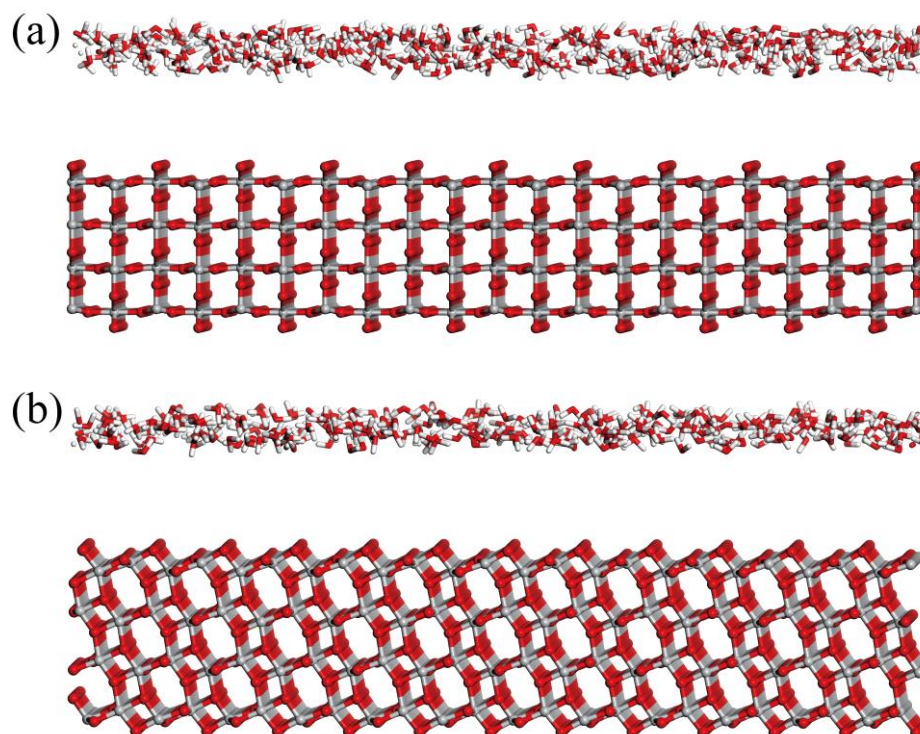

**Figure S1.** Initial models of simulation are established. (a) H<sub>2</sub>O molecules on the rutile (110) surface at the coverage of 2.0 ML. (b) H<sub>2</sub>O molecules on the anatase (101) surface at the coverage of 2.0 ML. Grey, red, and white balls represent Ti, O, and H atoms, respectively. The upper H<sub>2</sub>O is represented by a stick model.

## 2. System potential energy

The time evolution of potential energy is calculated. From Figure S1, the result suggests that the system potential energy becomes stable after the water dissociation.

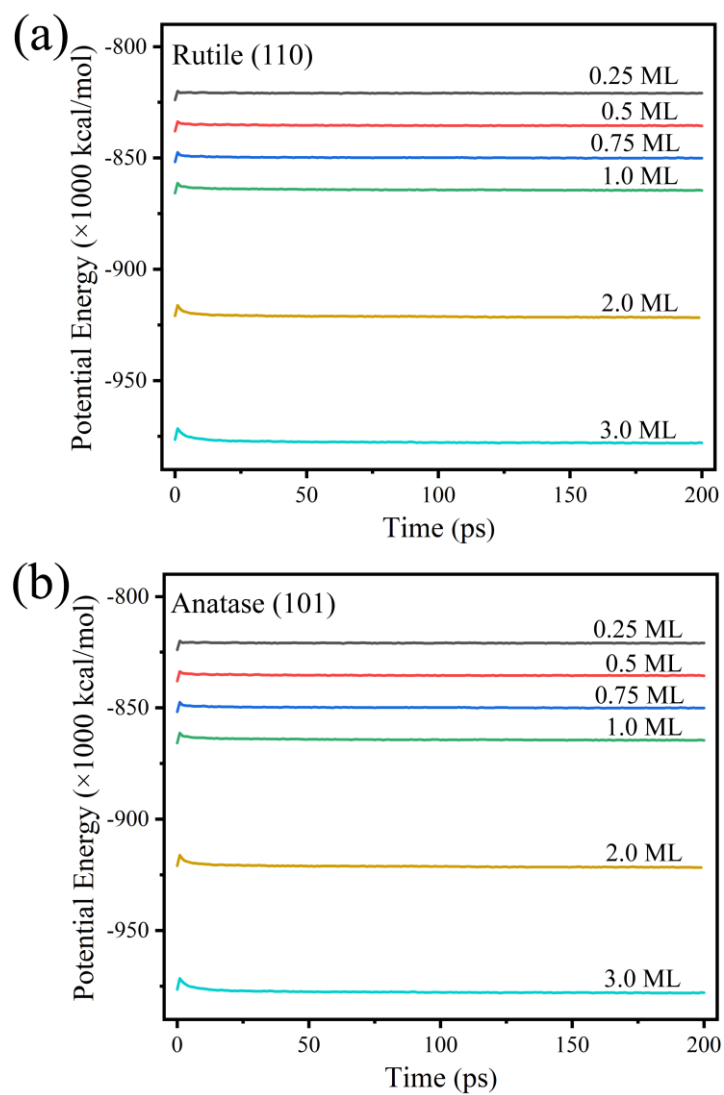

**Figure S2.** The time evolution of potential energy on (a) the rutile (110) surface and (b) the anatase (101) surface during the NVT RMD simulation of water dissociation.

### 3. The interfacial H-bond on the anatase (101) surface.

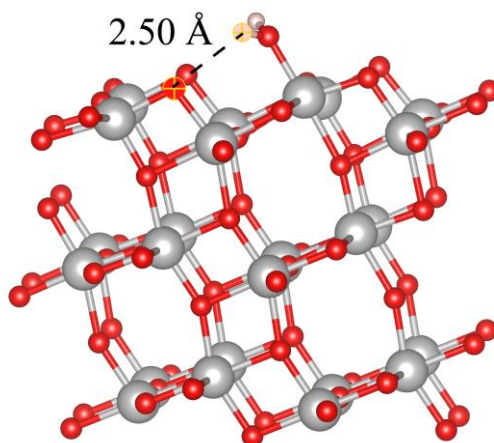

**Figure S3.** The molecular absorption of H<sub>2</sub>O on the anatase (101) surface.
